# Supplementary material
Source: Springer Nature journal article supplement (https://www.springermedizin.de/resource/supplementary/12889_2014_6493_MOESM2_ESM.pdf/9498178)

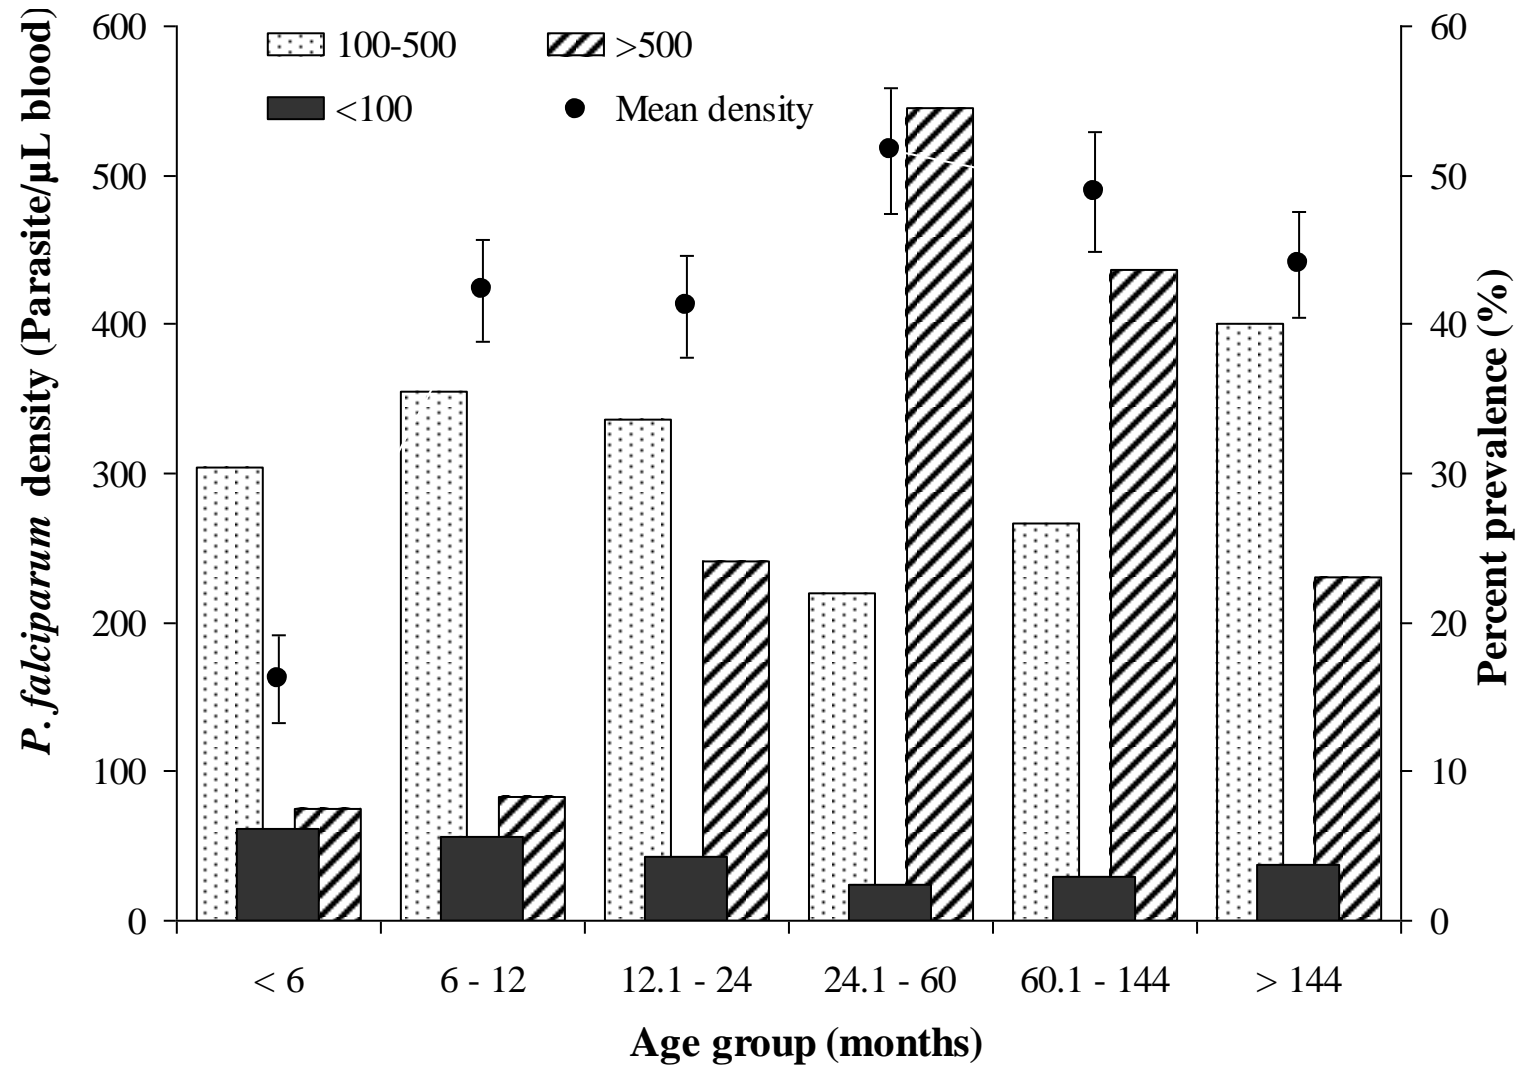

Supplement: MOESM2 [file 9498178]
